# Supplementary material for: Ternary composites of delaminated-MnO2/PDDA/functionalized-CNOs for high-capacity supercapacitor electrodes
Source: Royal Society of Chemistry journal article supplement (doi:10.1039/c4ta04439h), 2014-01-01
Supplement: c4ta04439h1.pdf [file c4ta04439h1.pdf]

***Ternary composites of delaminated-MnO<sub>2</sub>/PDDA/functionalized-CNOs for high-capacity supercapacitor electrodes.***

Rituraj Borgohain\*<sup>1,3</sup>, John P. Selegue<sup>1</sup>, Y.-T. Cheng<sup>2</sup>

<sup>1</sup>Department of Chemistry and <sup>2</sup>Department of Chemical and Materials Engineering, University of Kentucky, Lexington, Kentucky 40506, USA.

\*Corresponding author present address: <sup>3</sup>EORI, School of Energy Dept. # 4068, 1000 E. University Ave., University of Wyoming, Laramie, Wyoming 82071, USA

Email: rborgoha@uwyo.edu. (307) 7662735, (307) 766-2737 (fax).

**Supplementary Information**

**Thermogravimetric analysis (TGA).** TGA analyses were carried out using a TA Hi-Res TGA 2950. Typically, 3–5 mg of the sample was analyzed with a Hi-Res dynamic ramp (room temperature to 800 °C at 50 °C min<sup>-1</sup> with a resolution factor of 4) under constant airflow (60 mL•min<sup>-1</sup>).

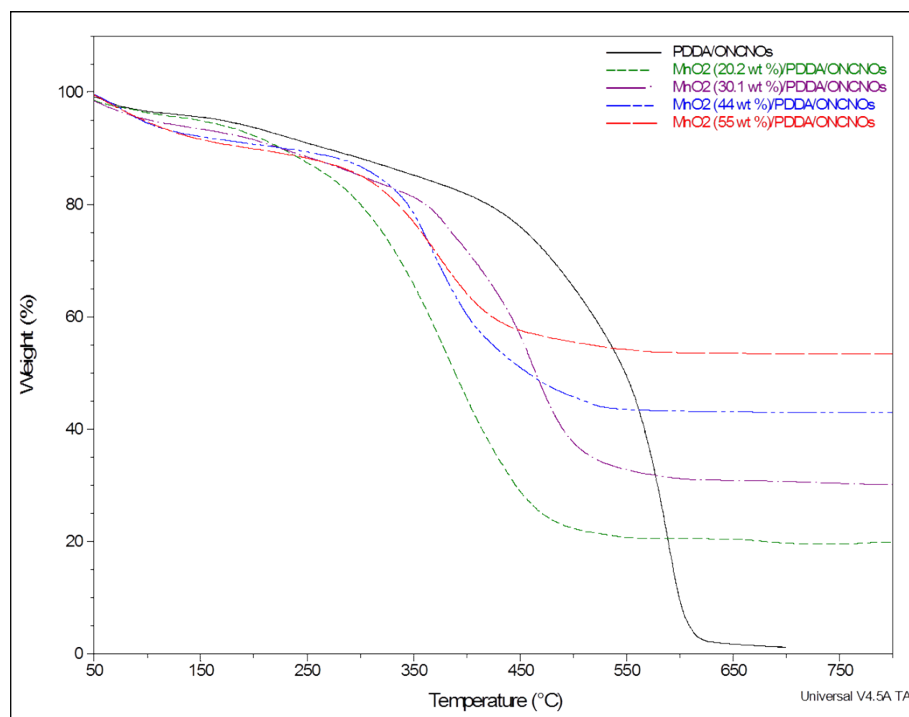

**Figure S1.** TGA analysis of the PDDA/ONCNOs and MnO<sub>2</sub>/PDDA/ONCNOs composites

XRD analysis of the  $\text{MnO}_2$  composites' residue (obtained after TGA analysis) shows that  $\text{MnO}_2$  converts to  $\text{Mn}_2\text{O}_3$  under high-temperature analysis in air. So, based on the wt. % of  $\text{Mn}_2\text{O}_3$  in the residue and stoichiometric calculations, the wt. % of  $\text{MnO}_2$  in the initial material was determined.

**Rate performance study of  $\text{MnO}_2$ /PDDA/ONCNOs composites:**

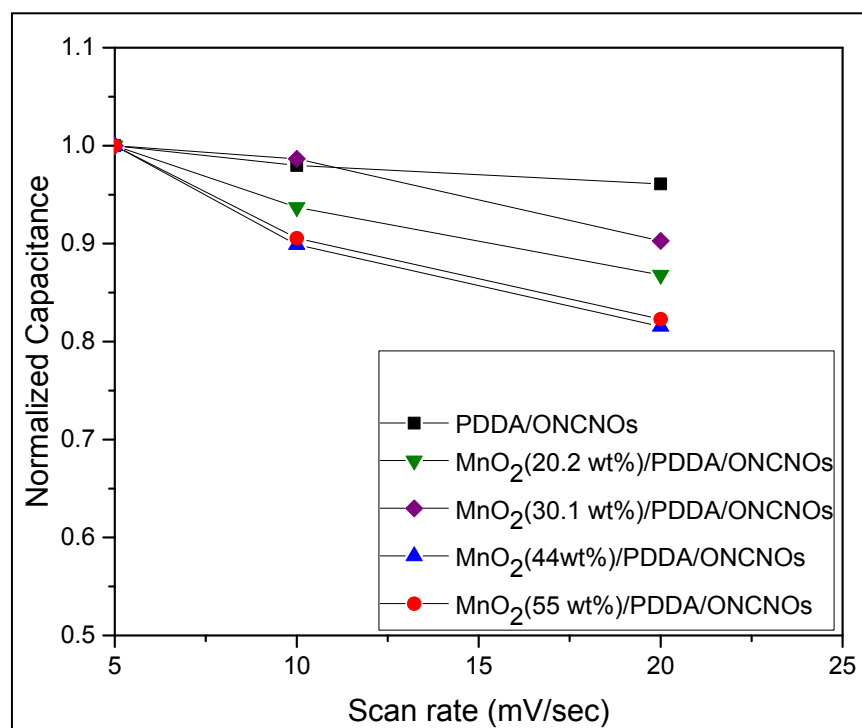

**Figure S2.** Rate performance of PDDA/ONCNOs and  $\text{MnO}_2$ /PDDA/ONCNOs
